# Supplementary material for: Long-Term Chronic Intermittent Hypobaric Hypoxia in Rats Causes an Imbalance in the Asymmetric Dimethylarginine/Nitric Oxide Pathway and ROS Activity: A Possible Synergistic Mechanism for Altitude Pulmonary Hypertension?
Source: Hindawi journal article supplement (doi:10.1155/2016/6578578), 2016-01-01
Supplement: f1 [file 6578578.f1.pdf]

**Additional File 1:** Primer sequences used for mRNA expression analysis by qRT-PCR in whole-lung homogenates of rats exposed to chronic intermittent hypoxia, chronic hypoxia and normoxia. The sequence of the primers for rats oligonucleotide were designed based on NCBI GenBank .

|                   |                                  |
|-------------------|----------------------------------|
| <b>rArgI_for</b>  | 5'-TTGTCAGCGGAGTGTTGATGTC-3'     |
| <b>rArgI_rev</b>  | 5'-CAGAGACCCAGAAGAATGGAAC -3'    |
| <b>rArgII_for</b> | 5'-AAGAAAGGAGTGGAATATGGCCCAGC-3' |
| <b>rArgII_rev</b> | 5'-TAGCCACCTGACACAGCTCTACTAA-3'  |
| <b>reNos_for</b>  | 5'-TGATCCTAACTTGCCTTGCATCCT-3'   |
| <b>reNos_rev</b>  | 5'-ACTCCACGCTGCTGGGCGTC-3'       |
| <b>Nox4 for</b>   | 5'- TGCCGCACAGTCCTGGCTTACC -3'   |
| <b>Nox4 rev</b>   | 5'- GGGCGTTCACCAAGTGGGCAGC -3'   |
| <b>rHprt_for</b>  | 5'-TCCTCATGGACTGATTATGGACA-3'    |
| <b>rHprt_rev</b>  | 5'-TAATCCAGCAGGTCAGCAAAGA-3'     |
| <b>rDDAH1_for</b> | 5'-GAGGCTTTGGAAAACTTCAGCTCA-3'   |
| <b>rDDAH1_rev</b> | 5'-GCCAAGATCTCAGCACCTCGTTGAT-3'  |
| <b>rDDAH2_for</b> | 5'-GCATCTGCGCGGCCTCTGTG-3'       |
| <b>rDDAH2_rev</b> | 5'-AGTCACTCGCTGCGTCATCTGGGAG-3'  |
